# Supplementary material for: Insight on the Interaction between the Camptothecin Derivative and DNA Oligomer Mimicking the Target of Topo I Inhibitors
Source: MDPI journal article supplement (doi:10.3390/molecules27206946), 2022-10-17
Supplement: s1 [file s1]

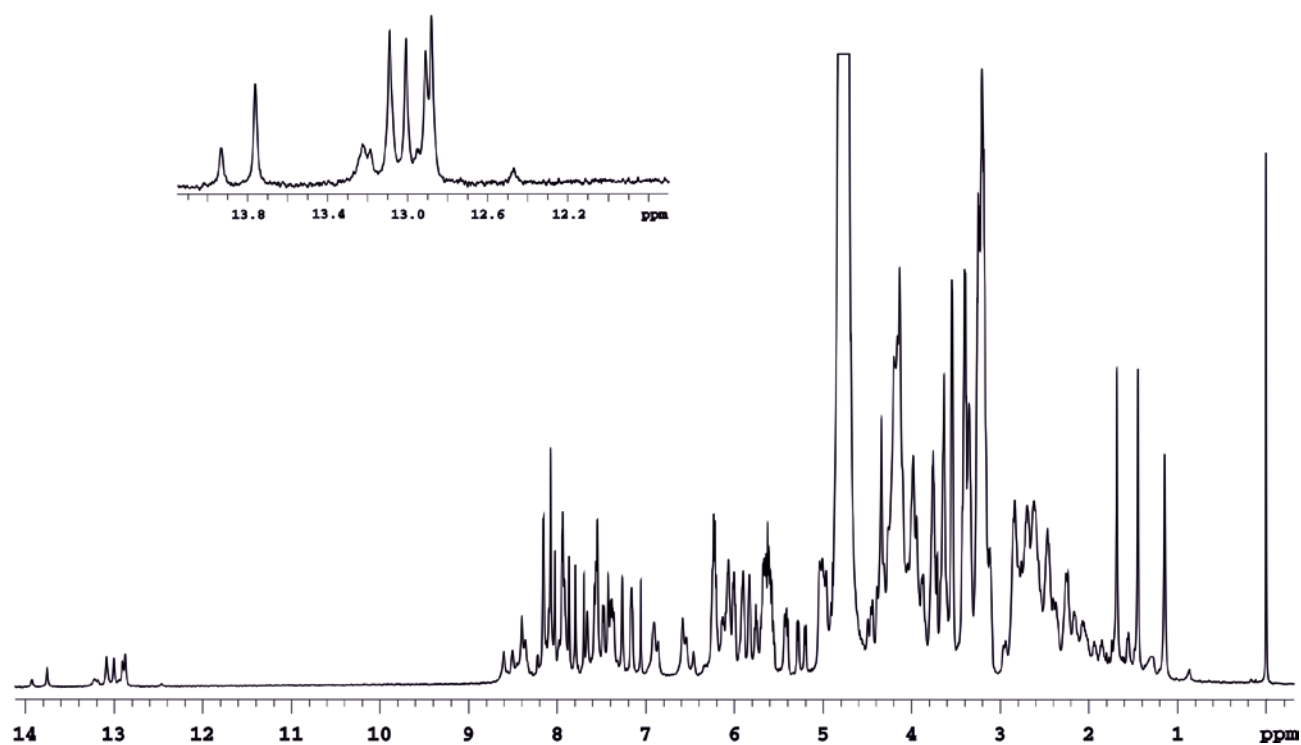

**Figure S1** The  $^1\text{H}$  NMR spectrum of nicked decamer **2B** in buffered  $\text{H}_2\text{O}/\text{D}_2\text{O}$ . (90/10 vol%) 25 mM NaCl /25 mM  $\text{K}_3\text{PO}_4$ . at pH 6. Seven guanosine and 3 thymidine NHs hydrogen bonded, forming a duplex are shown in an inset.

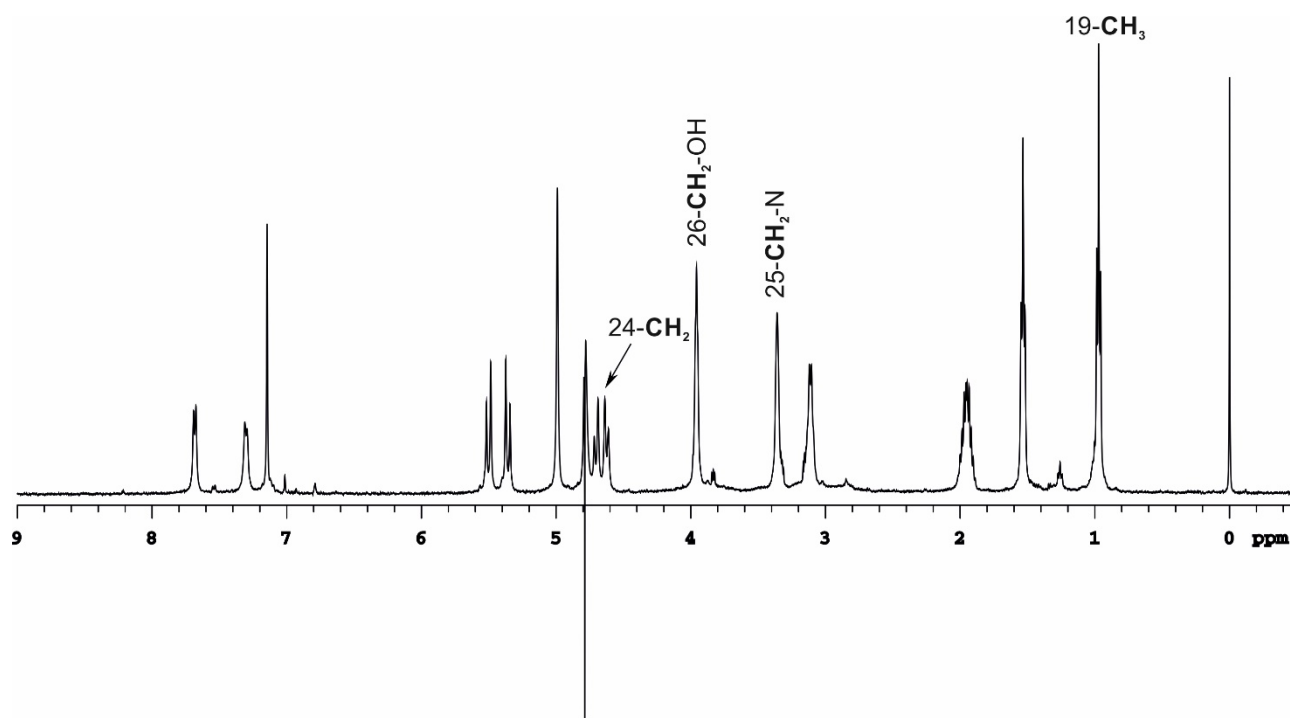

**Figure S2** The  $^1\text{H}$  NMR spectrum of **1** in buffered  $\text{D}_2\text{O}$ . 25 mM NaCl /25 mM  $\text{K}_3\text{PO}_4$ . at pH 6.

**Table S1.** The  $^1\text{H}$  NMR chemical shifts  $\delta$  [ppm] of DNA **2B** and SN38 derivative **1** from NOESY spectrum in buffered  $\text{D}_2\text{O}$ . at  $25^\circ\text{C}$  (**1:3** ratio) \*

| Base      | H1'          | H2'          | H2''         | H3'          | H4'          | H5'. H5''           | H6/8         | H2/5/Me      |
|-----------|--------------|--------------|--------------|--------------|--------------|---------------------|--------------|--------------|
| G1        | 5.993        | 2.772        | 2.833        | 4.958        | 4.332        | 3.879/3.987         | 8.058        | -            |
| C2        | 5.694        | 2.125        | 2.426        | 4.861        | 4.208        | na/4.163            | 7.377        | 5.372        |
| G3        | 6.046        | 2.672        | 2.806        | 5.002        | 4.422        | na/ na              | 7.907        | -            |
| T4        | 6.06         | 2.071        | 2.546        | 4.883        | 4.233        | na                  | 7.268        | 1.424        |
| <b>T5</b> | <b>6.215</b> | <b>2.543</b> | <b>2.555</b> | <b>4.985</b> | <b>4.178</b> | <b>na</b>           | 7.494        | <b>1.671</b> |
| nick      | -----        | -----        | -----        | -----        | -----        | -----               | -----        | -----        |
| <b>G6</b> | <b>5.47</b>  | <b>2.316</b> | <b>2.561</b> | <b>4.69</b>  | <b>4.154</b> | <b>3.794/ 3.873</b> | <b>7.674</b> | -            |
| T7        | 6.006        | 2.151        | 2.506        | 4.846        | 4.202        | na/ 4.108           | 7.306        | 1.120        |
| C8        | 5.725        | 2.002        | 2.355        | 4.838        | 4.09         | na/ na              | 7.427        | 5.587        |
| G9        | 5.896        | 2.623        | 2.69         | 4.999        | 4.353        | na/ na              | 7.917        | -            |
| C10       | 6.219        | 2.234        | 2.463        | 4.844        | 4.188        | na / 4.245          | 7.56         | 5.594        |

| Base       | H1'          | H2'          | H2''         | H3'          | H4'          | H5'. H5''          | H6/8         | H2/5/Me      |
|------------|--------------|--------------|--------------|--------------|--------------|--------------------|--------------|--------------|
| G11        | 5.99         | 2.756        | 2.822        | 4.952        | 4.332        | 3.879/ 3.987       | 8.058        | -            |
| C12        | 5.677        | 1.994        | 2.372        | 4.853        | 4.168        | na/ na             | 7.333        | 5.378        |
| G13        | 5.667        | 2.761        | 2.761        | 5.032        | 4.387        | na/ na             | 7.892        | -            |
| A14        | 6.197        | 2.69         | 2.798        | 4.909        | 4.434        | na/ na             | 8.064        | 7.737        |
| <b>C15</b> | <b>5.772</b> | <b>2.176</b> | <b>2.504</b> | <b>na</b>    | <b>4.164</b> | <b>4.17/ 4.298</b> | <b>7.191</b> | <b>5.025</b> |
|            |              |              |              |              |              |                    |              |              |
| <b>A16</b> | <b>5.587</b> | <b>2.594</b> | <b>2.701</b> | <b>4.963</b> | <b>na</b>    | <b>na / na</b>     | <b>7.783</b> | <b>6.84</b>  |
| A17        | 6.085        | 2.583        | 2.793        | 5.003        | 4.43         | na / na            | 8.073        | 7.602        |
| C18        | 5.57         | 1.862        | 2.268        | 4.779        | 4.123        | na/ 4.233          | 7.173        | 5.186        |
| G19        | 5.881        | 2.58         | 2.682        | 4.969        | 4.332        | na / na            | 7.86         | -            |
| C20        | 6.213        | 2.234        | 2.463        | 4.844        | 4.188        | na / na            | 7.548        | 5.573        |

\* The G6-C15 and T5-A16 base pairs. in bold. are flanking both faces of a nick.

na-not assigned.

**Table S2.** The  $^1\text{H}$  NMR chemical shifts  $\delta$  [ppm] of changes induced in free DNA decamer and **1** in  $\text{D}_2\text{O}$  (**1:3** ratio).

| Base | H1'          | H2'           | H2''           | H3'           | H4'           | H5'. H5''            | H6/8         | H2/5/Me       |
|------|--------------|---------------|----------------|---------------|---------------|----------------------|--------------|---------------|
| G1   | -0.01        | -0.001        | - 0.006        | -0.001        | -0.011        | 0 / -0.024           | -0.02        | -             |
| C2   | 0.00         | -0.026        | - 0.033        | -0.007        | -0.019        | -                    | -0.014       | -0.035        |
| G3   | -0.04        | -0.029        | - 0.048        | -0.019        | -0.016        | -                    | -0.04        | -             |
| T4   | 0.00         | -0.013        | - 0.061        | 0.012         | -0.041        | -                    | 0            | -0.022        |
| T5   | <b>0.01</b>  | <b>0.045</b>  | <b>- 0.062</b> | <b>-0.005</b> | <b>-0.022</b> | -                    | <b>0.069</b> | <b>-0.020</b> |
| nick | -----        | -----         | -----          | -----         | -----         | -----                | -----        | -----         |
| G6   | <b>-0.36</b> | <b>-0.326</b> | <b>- 0.081</b> | <b>0.02</b>   | <b>-0.053</b> | <b>-0.08 / -0.26</b> | <b>0.009</b> | -             |
| T7   | -0.06        | -0.029        | - 0.051        | -0.025        | -0.115        | -                    | -0.236       | -0.027        |
| C8   | -0.04        | -0.064        | - 0.063        | -0.03         | -0.043        | -                    | -0.048       | -0.049        |
| G9   | -0.01        | 0.009         | - 0.002        | 0.009         | -0.001        | -                    | -0.021       | -             |
| C10  | -0.01        | -0.022        | 0.002          | -0.002        | -0.013        | -                    | 0.012        | -0.022        |

| Base | H1'          | H2'          | H2''          | H3'           | H4'         | H5'. H5''  | H6/8          | H2/5/Me       |
|------|--------------|--------------|---------------|---------------|-------------|------------|---------------|---------------|
| G11  | -0.01        | -0.017       | -0.017        | -0.007        | -0.011      | 0 / -0.024 | -0.02         | -             |
| C12  | -0.01        | -0.021       | -0.013        | 0.003         | -0.013      | -          | -0.034        | -0.05         |
| G13  | 0            | 0.023        | -0.054        | -0.015        | -0.007      | -          | -0.028        | -             |
| A14  | -0.02        | 0.009        | -0.15         | -0.122        | -0.059      | -          | -0.094        | <b>-0.06</b>  |
| C15  | <b>-0.09</b> | <b>0.238</b> | <b>0.142</b>  | -             | <b>0.02</b> | -          | <b>0.035</b>  | <b>-0.265</b> |
| A16  | <b>0.057</b> | <b>0.020</b> | <b>-0.107</b> | <b>-0.045</b> | -           | -          | <b>-0.247</b> | <b>-0.218</b> |
| A17  | -0.02        | -0.056       | -0.045        | -0.034        | -0.029      | -          | -0.088        | <b>-0.101</b> |
| C18  | -0.01        | 0.007        | -0.011        | -0.026        | -0.019      | -          | 0.006         | -0.014        |
| G19  | 0.012        | -0.034       | -0.01         | -0.021        | -0.022      | -          | -0.008        | -             |
| C20  | 0            | -0.022       | 0.002         | -0.002        | -0.013      | -          | -0.007        | -0.017        |

**Table S3.** The  $^1\text{H}$  NMR chemical shift changes in SN38 derivative **1** after addition to DNA.

| Compound 1          | Free; $\delta$ [ppm] | Complex 1+2;<br>$\delta$ [ppm] | $\Delta$ [ppm] | $\Delta$ [Hz] |
|---------------------|----------------------|--------------------------------|----------------|---------------|
| 19-CH <sub>3</sub>  | 0.972                | 0.98                           | 0.008          | 4             |
| 23-CH <sub>3</sub>  | 1.534                | 1.422                          | -0.112         | -56           |
| 18-CH <sub>2</sub>  | 1.954                | 1.908                          | -0.046         | -23           |
| 22-CH <sub>2</sub>  | 3.113                | 2.986                          | -0.127         | -63.5         |
| 25-NCH <sub>2</sub> | 3.358                | 3.404                          | 0.046          | 23            |
| 26-OCH <sub>2</sub> | 3.958                | 3.975                          | 0.017          | 8.5           |
| 24-CH <sub>2</sub>  | 4.624                | 4.615                          | -0.009         | -4.5          |
| 24-CH <sub>2</sub>  | 4.707                | 4.615                          | -0.092         | -46           |
| 5-CH <sub>2</sub>   | 4.991                | no                             | no             | no            |
| 17-CH <sub>2</sub>  | 5.358                | 5.456                          | 0.098          | 49            |
| 17-CH <sub>2</sub>  | 5.5                  | 5.456                          | -0.044         | -22           |
| 14-CH               | 7.146                | 7.038                          | -0.108         | -54           |
| 11-CH               | 7.303                | 7.136                          | -0.167         | -83.5         |
| 12-CH               | 7.683                | 7.408                          | -0.275         | -137.5        |

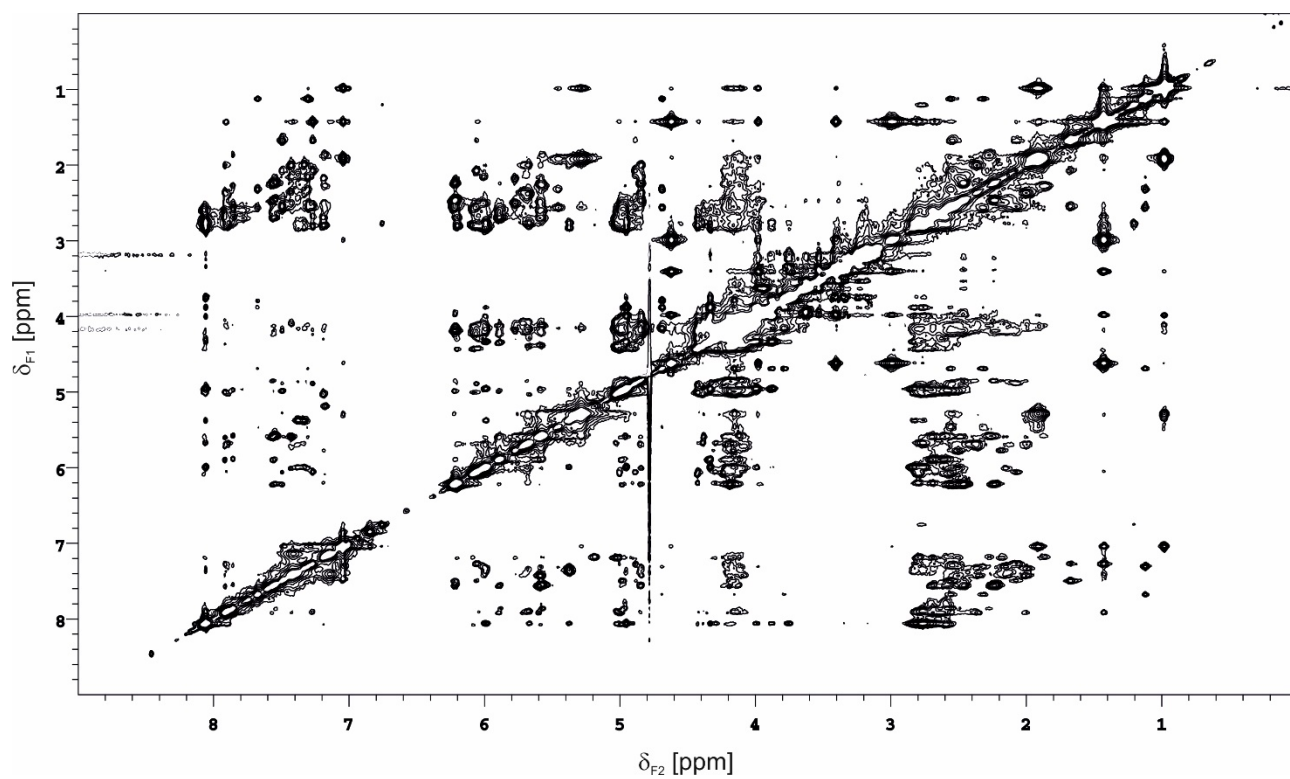

**Figure S3** The NOESY spectrum of the sample 1+2B (1:3 ratio).

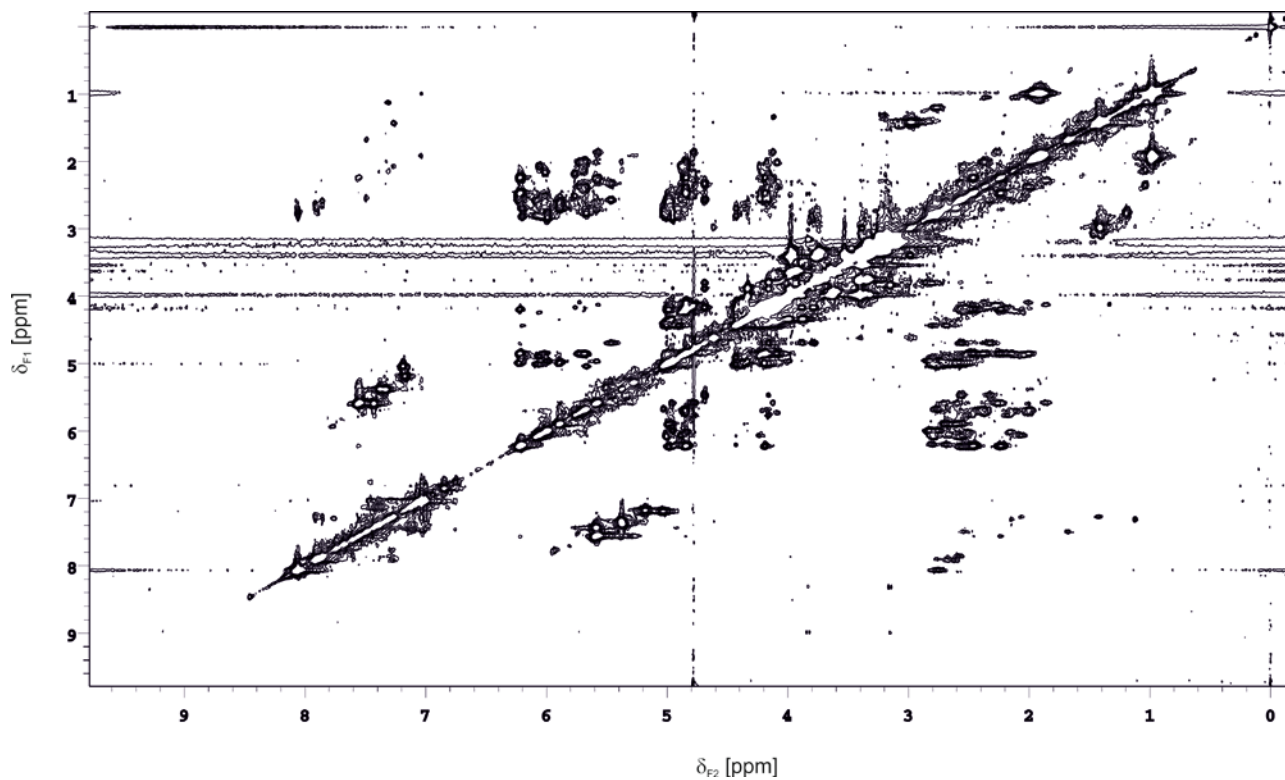

**Figure S4** The TOCSY spectrum of the sample 1+2B (1:3 ratio).

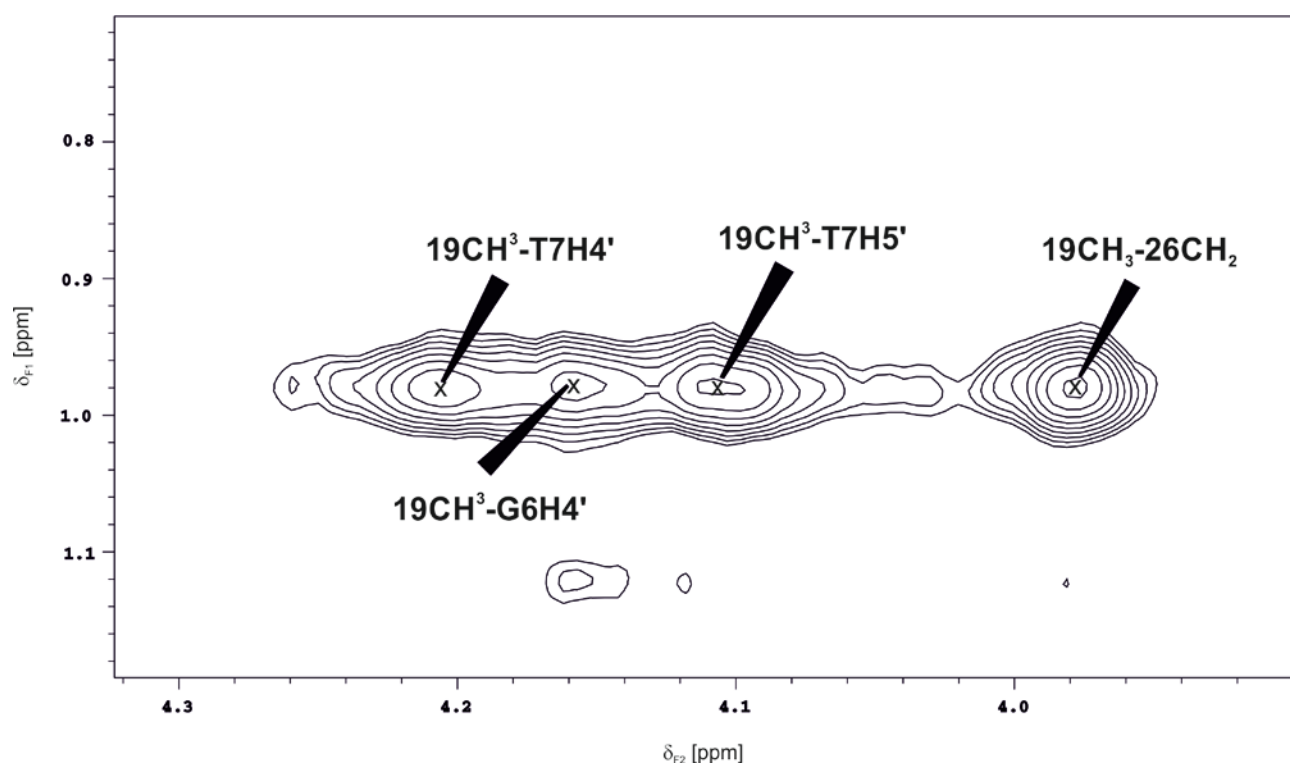

**Figure S5** The example of intermolecular cross-peaks in complex 1+2B before filtering the reaction solution.

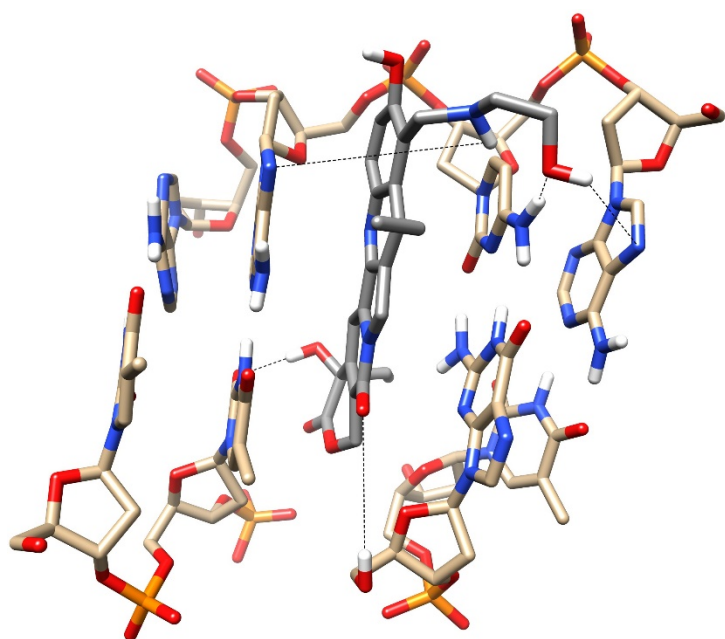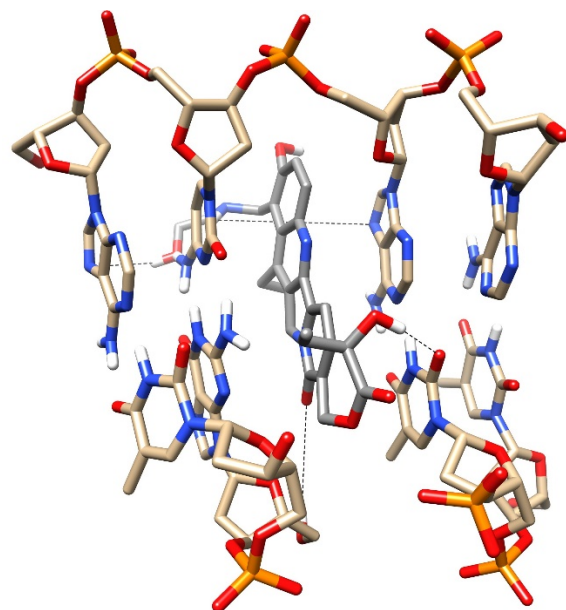

**Structure 1**

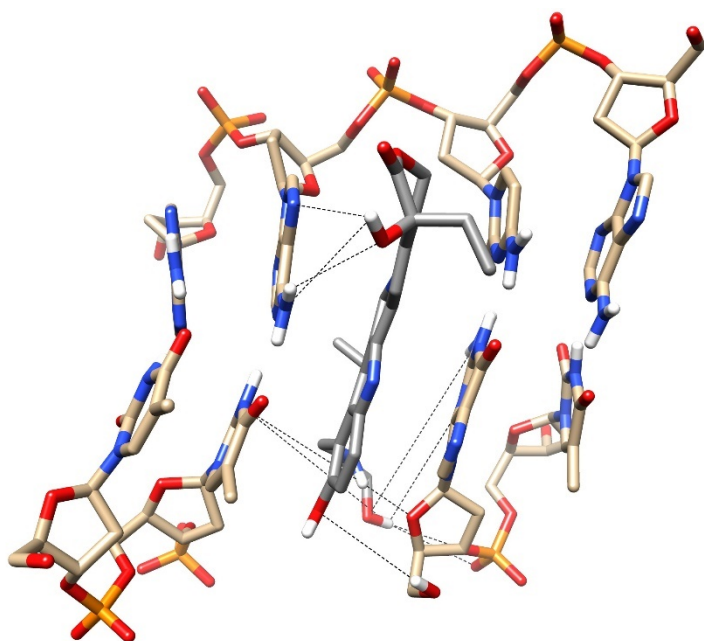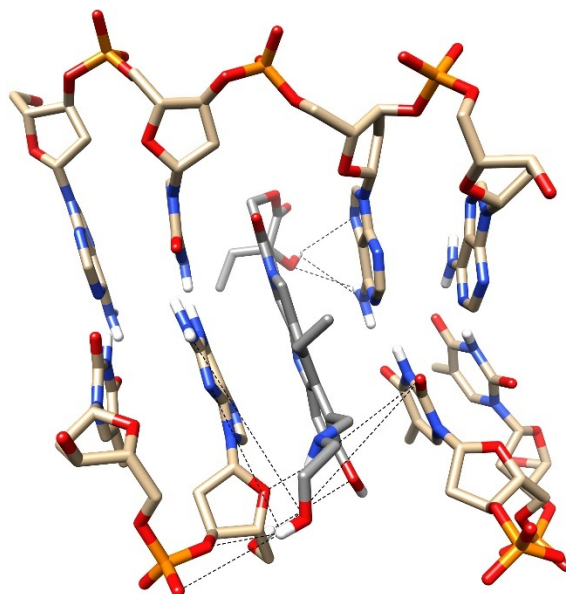

**Structure 2**

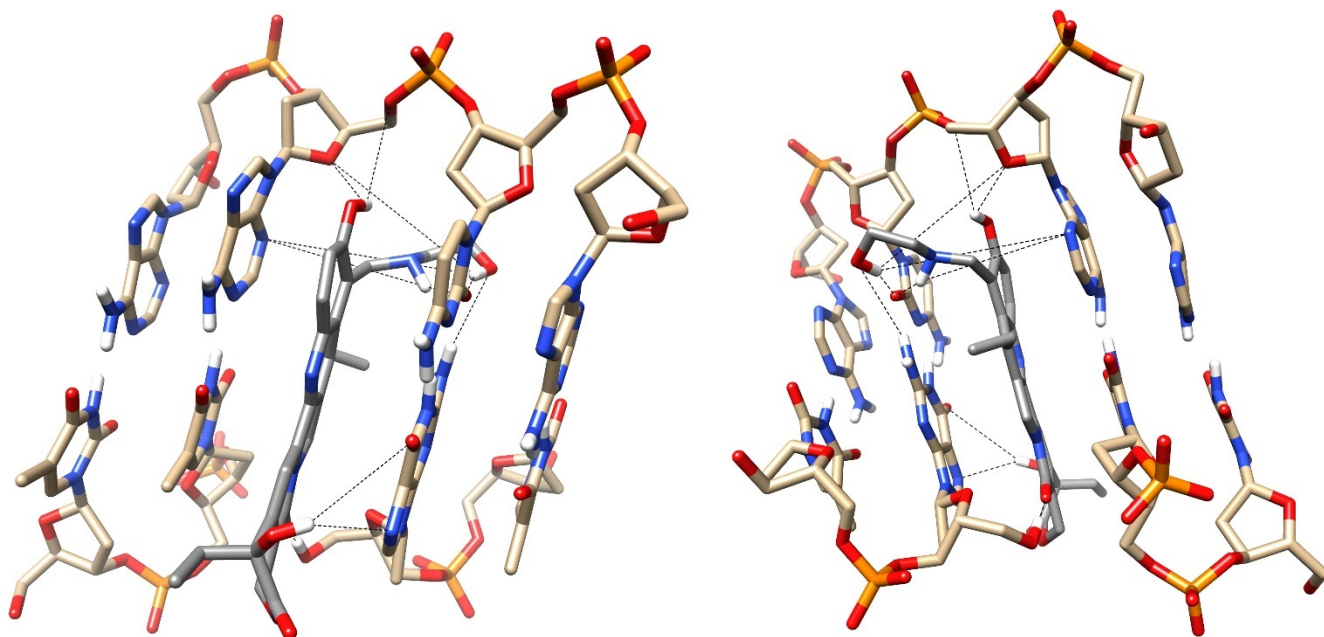

**Structure 3**

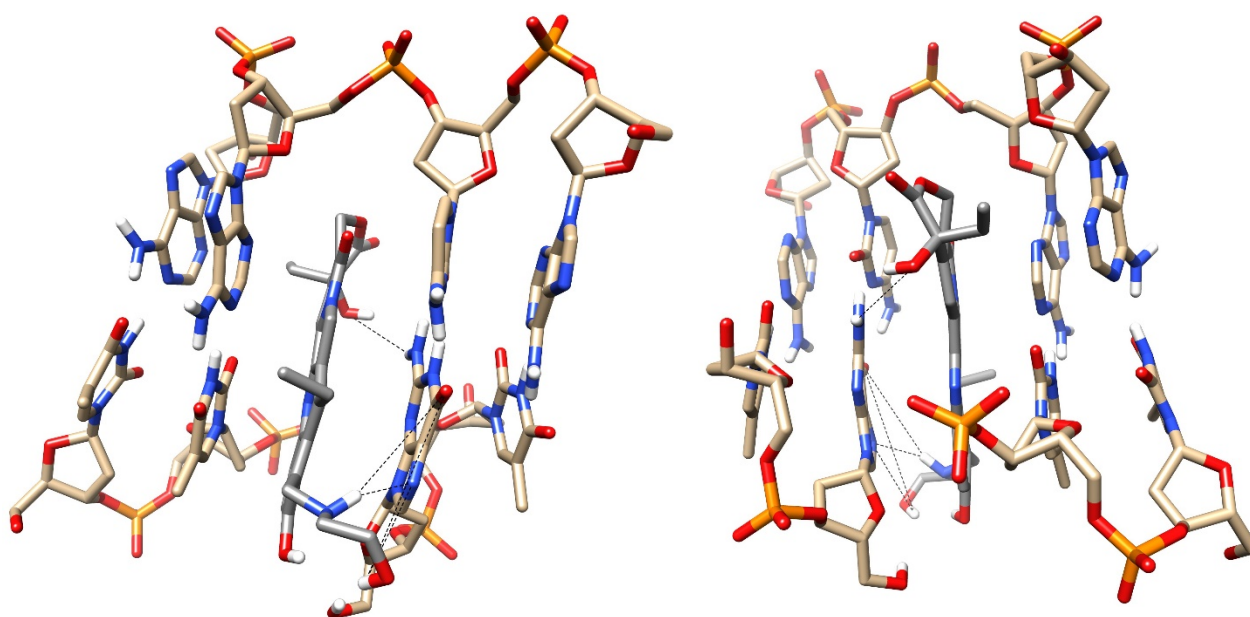

**Structure 4**

**Figure S6** The hydrogen bonding in structures best representing the most populated cluster obtained by cluster analysis in a molecular complex 1+2A.



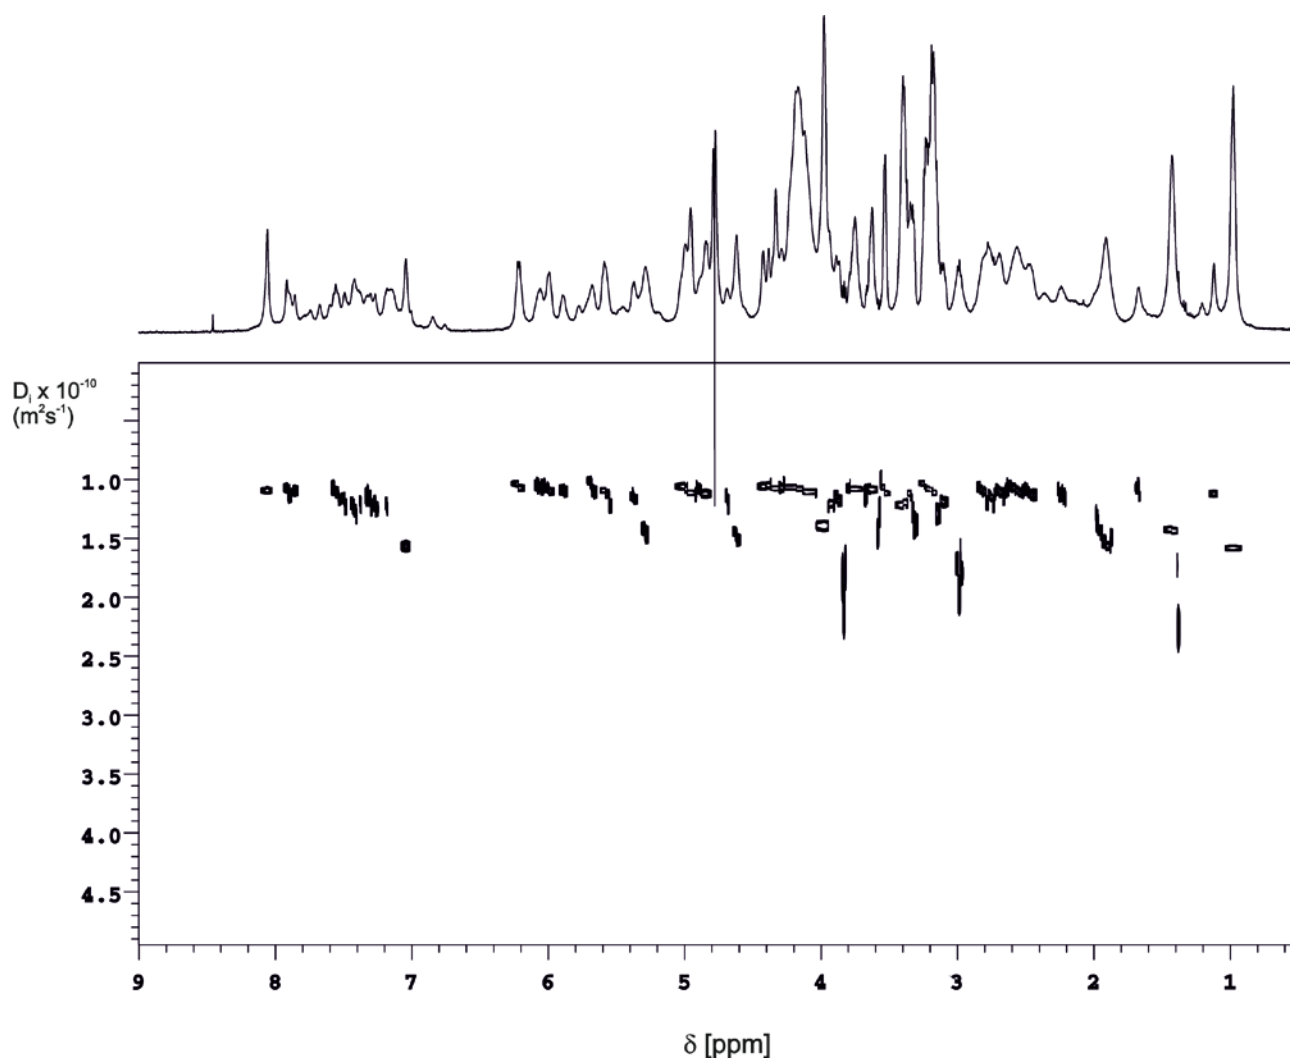

**Figure S7** The DOSY spectrum presenting mixture of **1** with **2B** at the start of the reaction in buffered  $\text{D}_2\text{O}$ . 25 mM NaCl /25 mM  $\text{K}_3\text{PO}_4$ . at pH 6.



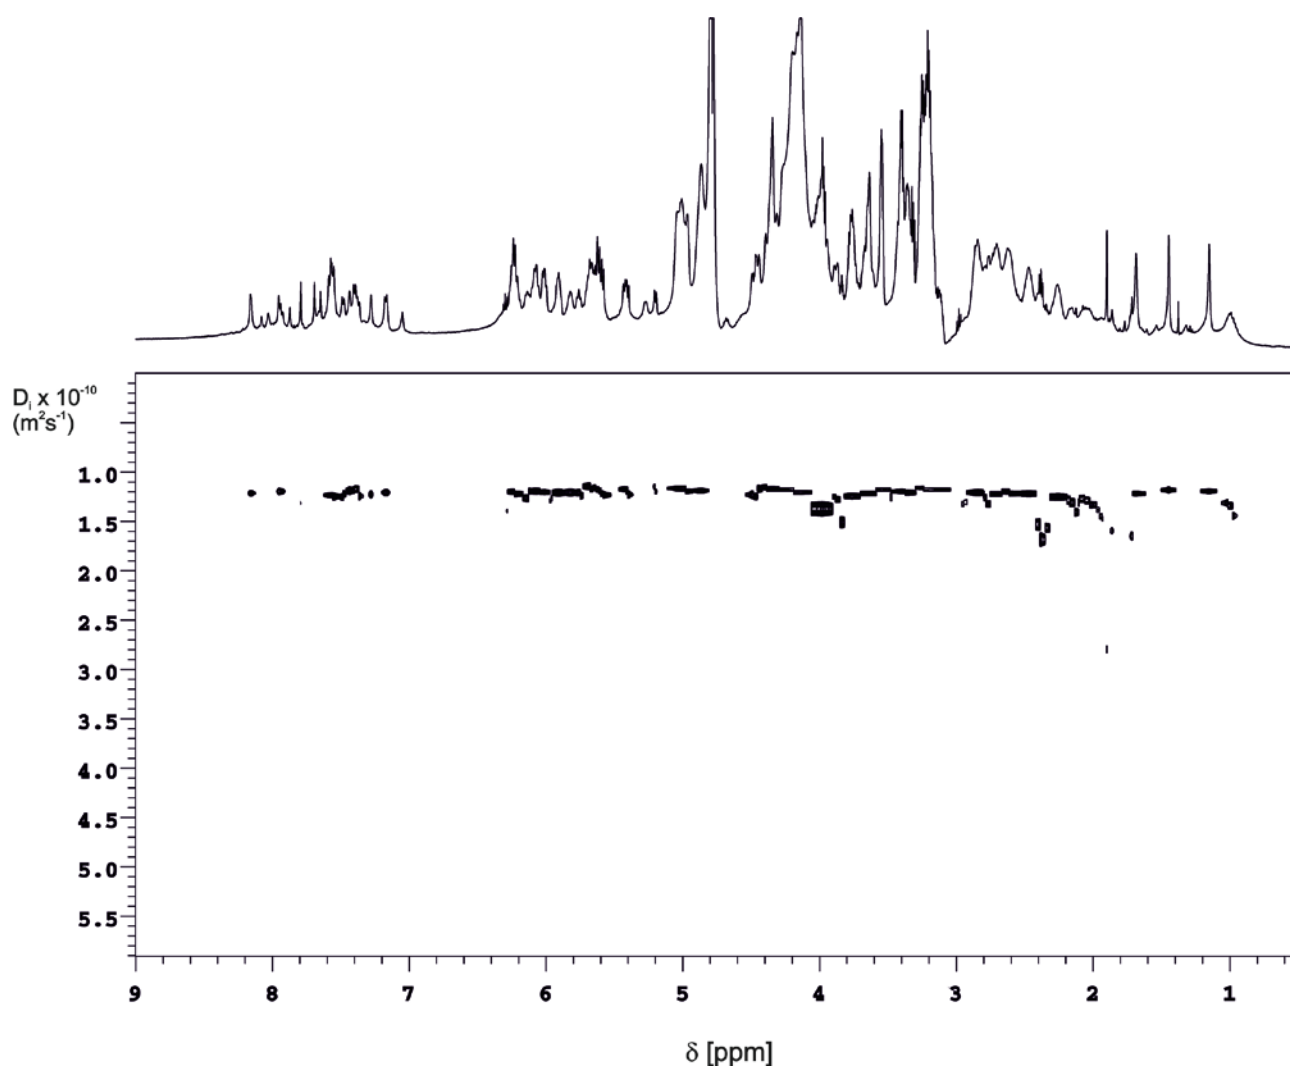

**Figure S8.** The full DOSY spectrum of a 1:1 complex of **1** and **2B** in D<sub>2</sub>O buffer, pH 6, 25°C.

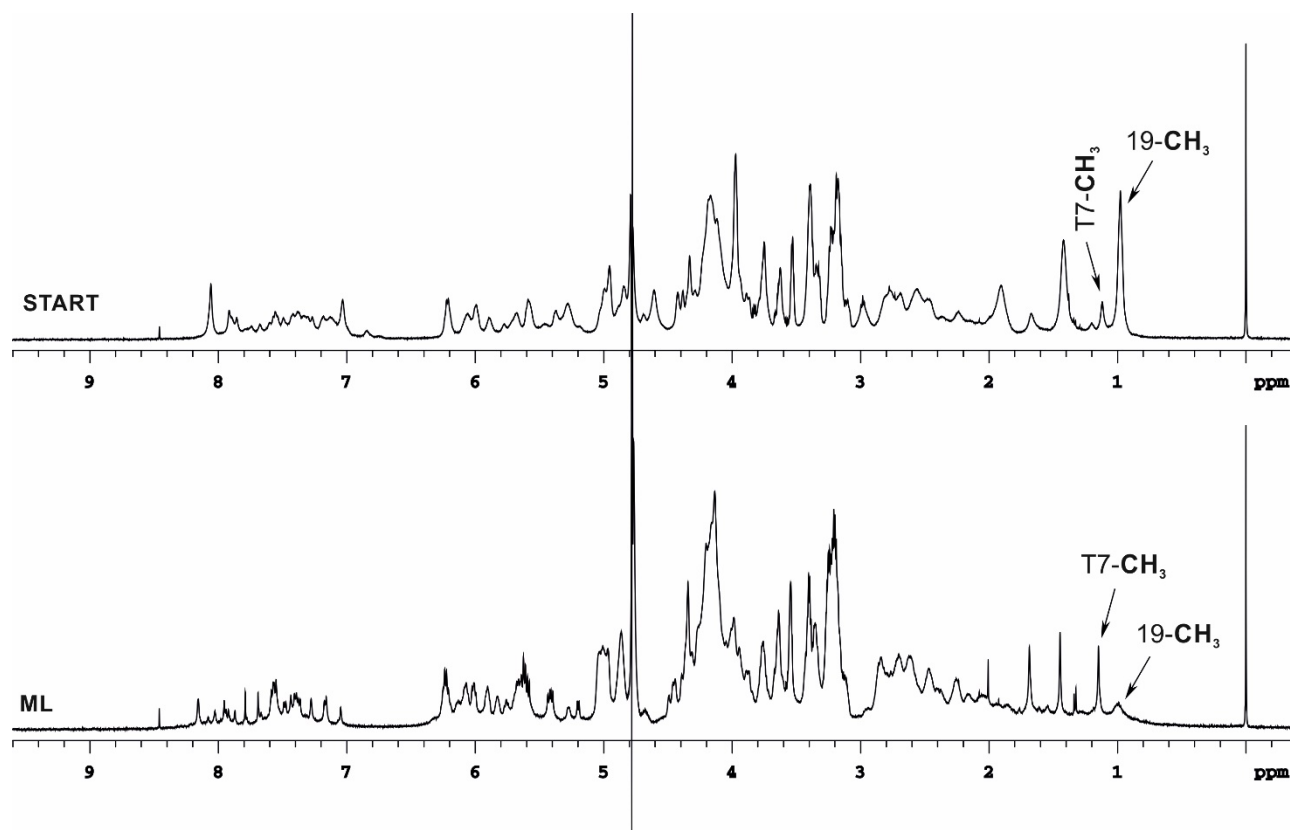

**Figure S9** The shape of 1D NMR spectrum of reaction mixture of **2B** with **1** at the start and in a mother liquor ML after filtering of reaction solution.

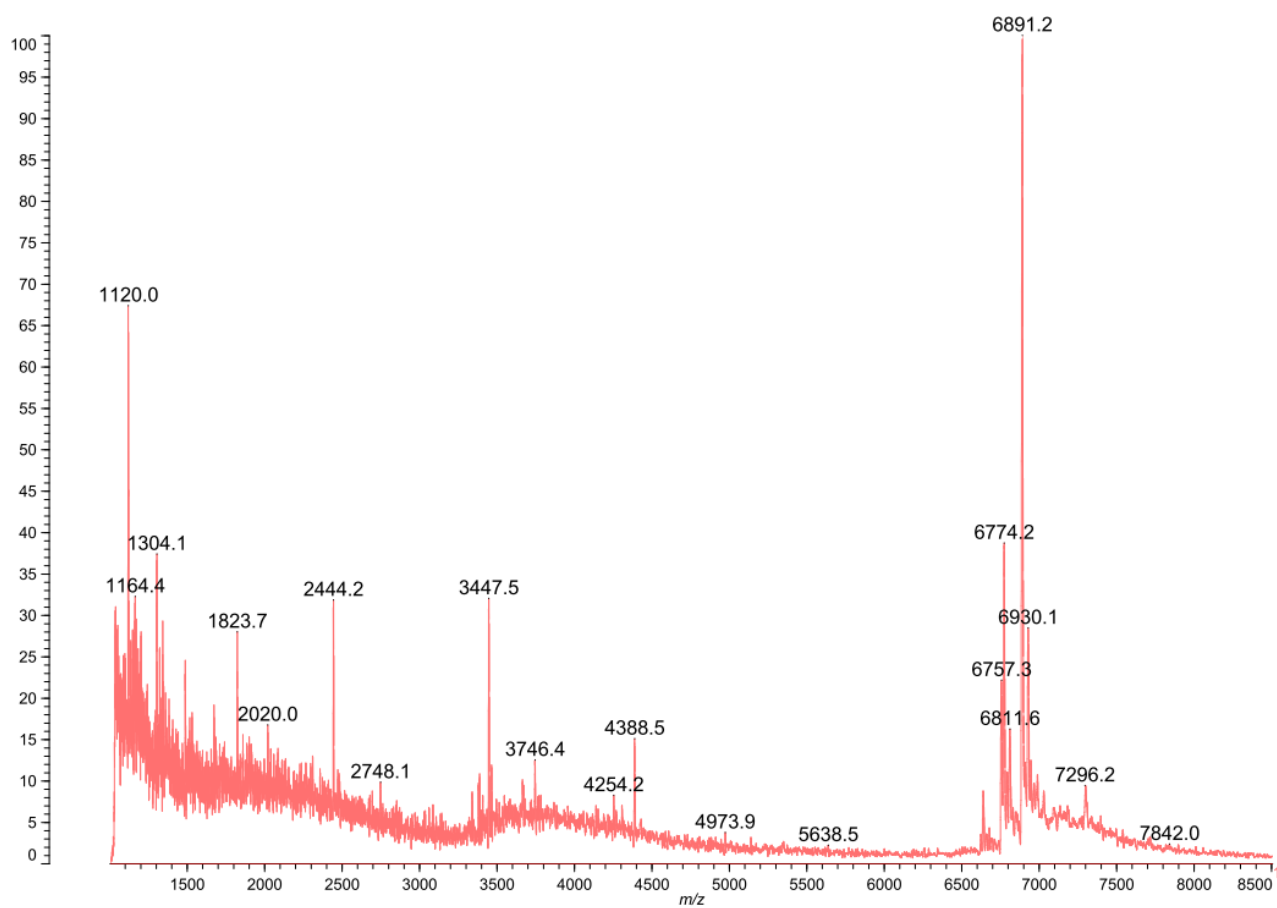

**Figure S10** The MALDI-ToF mass spectrum of lyophilized ML showing neat DNA decamer (2B) ( $m/z=6891.2$ ) and alkylated biohybrid with compound **1** ( $m/z=7296.2$ ).
